# Supplementary material for: Aberrant DNA Methylation Maker for Predicting Metachronous Recurrence After Endoscopic Resection of Gastric Neoplasms
Source: PubMed Central journal article supplement — Cancer Res Treat. 2022 Jan 18;54(4):1157–66. doi: 10.4143/crt.2021.997 (PMC9582476; doi:10.4143/crt.2021.997), 2022-01-18
Supplement: crt-2021-997_S1_Table.pdf [file crt-2021-997_S1_Table.pdf]

**S1 Table.** Characteristics of the study subjects at baseline according to metachronous recurrence (n=124)

| Variables                                    | Metachronous recurrence (n=124) |               | p-value               |
|----------------------------------------------|---------------------------------|---------------|-----------------------|
|                                              | No (n=104)                      | Yes (n=20)    |                       |
| Age (yr)                                     | 61.8±8.5                        | 63.6±6.6      | 0.385                 |
| Male sex                                     | 70 (67.3)                       | 13 (65.0)     | 0.841                 |
| Follow-up duration (day)                     | 1,601.5±429.2                   | 1,051.2±620.6 | < 0.001 <sup>a)</sup> |
| No. of endoscopic follow-up                  | 5.5±2.2                         | 3.8±2.0       | 0.002 <sup>a)</sup>   |
| <i>Helicobacter pylori</i> positive          | 38 (36.9)                       | 5 (25.0)      | 0.307                 |
| Current or ex-smoker (n=120)                 | 47 (46.5)                       | 8 (42.1)      | 0.842                 |
| Current or ex-drinker (n=120)                | 53 (52.5)                       | 10 (52.6)     | 0.996                 |
| Family history of GC in 1° relatives (n=120) | 20 (19.8)                       | 2 (10.5)      | 0.338                 |
| Body mass index (kg/m <sup>2</sup> )         | 24.3±3.3                        | 24.2±3.3      | 0.849                 |
| Education (n=120)                            |                                 |               |                       |
| Elementary-Middle-High                       | 56 (63.6)                       | 6 (46.2)      | 0.227                 |
| University                                   | 32 (36.4)                       | 7 (53.8)      |                       |
| Pathology of initial lesion                  |                                 |               |                       |
| Low-grade dysplasia                          | 28(26.9)                        | 8 (40.0)      | < 0.001 <sup>a)</sup> |
| High-grade dysplasia                         | 3 (2.9)                         | 5 (25.0)      |                       |
| Adenocarcinoma                               | 73 (70.2)                       | 7 (35.0)      |                       |
| OLGA stage (n=47)                            |                                 |               |                       |
| Stage 0                                      | 8 (20.0)                        | 1 (14.3)      | 0.714                 |
| Stage 1                                      | 8 (20.0)                        | 3 (42.9)      |                       |
| Stage 2                                      | 10 (25.0)                       | 1 (14.3)      |                       |
| Stage 3                                      | 10 (25.0)                       | 1 (14.3)      |                       |
| Stage 4                                      | 4 (10.0)                        | 1 (14.3)      |                       |
| OLGIM stage (n=121)                          |                                 |               |                       |
| Stage 0                                      | 17 (16.8)                       | 1 (5.0)       | 0.571                 |
| Stage 1                                      | 18 (17.8)                       | 5 (25.0)      |                       |
| Stage 2                                      | 34 (33.7)                       | 6 (30.0)      |                       |
| Stage 3                                      | 20 (19.8)                       | 4 (20.0)      |                       |
| Stage 4                                      | 12 (11.9)                       | 4 (20.0)      |                       |
| Synchronous EGCs/dysplasia <sup>b)</sup>     | 10 (9.6)                        | 5 (25.0)      | 0.053                 |
| <i>MOS</i> methylation level (%)             | 38.9±15.9                       | 49.8±20.7     | 0.009 <sup>a)</sup>   |
| <i>MOS</i> methylation high <sup>c)</sup>    | 36 (36.4)                       | 12 (60.0)     | 0.049 <sup>a)</sup>   |

p-values were calculated using chi-square test or Student's t test. EGC, early gastric cancer; GC, gastric cancer; OLGA, operative link on gastritis assessment; OLGIM, operative link on gastric intestinal metaplasia assessment. <sup>a)</sup>Statistically significant, <sup>b)</sup>Synchronous lesions were defined as secondary dysplasia or cancers detected within 1 year after initial diagnosis, <sup>c)</sup>*MOS* methylation high was defined as a level of methylation above the cutoff value (35.82%) determined by receiver operating curve analysis.
