# Supplementary material for: Aberrant DNA Methylation Maker for Predicting Metachronous Recurrence After Endoscopic Resection of Gastric Neoplasms
Source: PubMed Central journal article supplement — Cancer Res Treat. 2022 Jan 18;54(4):1157–66. doi: 10.4143/crt.2021.997 (PMC9582476; doi:10.4143/crt.2021.997), 2022-01-18
Supplement: crt-2021-997_S2_Fig.pdf [file crt-2021-997_S2_Fig.pdf]

**(A) OLGA stage (0, 1, 2 vs. 3, 4)**

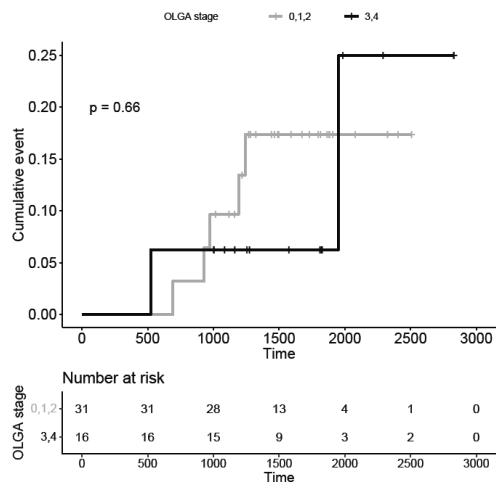

**(B) OLGIM stage (0, 1, 2 vs. 3, 4)**

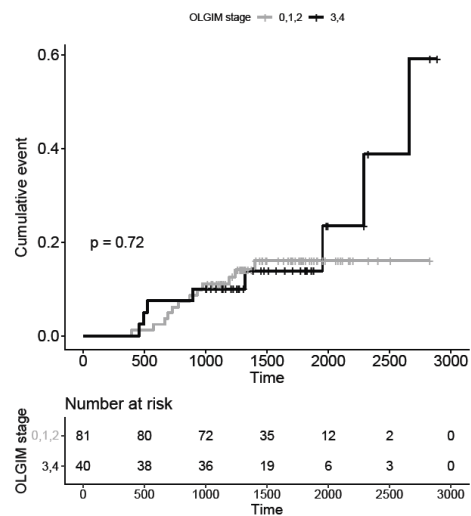

**S2 Fig.** Kaplan-Meier curves for cumulative incidences of metachronous recurrence according to OLGA (A) and OLGIM (B) stages comparing low-risk (grade 0 to 2) and high-risk (grade 3 and 4) groups (n=124). OLGA, operative link on gastritis assessment; OLGIM, operative link on gastric intestinal metaplasia assessment.
