# Supplementary material for: Aberrant DNA Methylation Maker for Predicting Metachronous Recurrence After Endoscopic Resection of Gastric Neoplasms
Source: PubMed Central journal article supplement — Cancer Res Treat. 2022 Jan 18;54(4):1157–66. doi: 10.4143/crt.2021.997 (PMC9582476; doi:10.4143/crt.2021.997), 2022-01-18
Supplement: crt-2021-997_S3_Table.pdf [file crt-2021-997_S3_Table.pdf]

**S3 Table.** Univariate and multivariate Cox proportional regression analyses of the metachronous recurrence in the whole cohort (n=261)

|                               | Crude HR (95% CI) | p-value             | p for trend         | Adjusted HR <sup>a)</sup> (95% CI) | p-value <sup>a)</sup> | p for trend         |
|-------------------------------|-------------------|---------------------|---------------------|------------------------------------|-----------------------|---------------------|
| <i>MOS</i> high <sup>b)</sup> | 4.46 (1.46-13.62) | 0.009 <sup>c)</sup> |                     | 4.49 (1.45-13.86)                  | 0.009 <sup>c)</sup>   |                     |
| Atrophic gastritis            | 1.13 (0.13-9.66)  | 0.914               |                     | 1.05 (0.11-10.23)                  | 0.966                 |                     |
| Intestinal metaplasia         | 3.07 (0.41-23.09) | 0.277               |                     | 2.74 (0.36-21.07)                  | 0.333                 |                     |
| <i>MOS</i> quartile           |                   |                     |                     |                                    |                       |                     |
| Q1                            | 1 (reference)     |                     |                     | 1 (reference)                      |                       |                     |
| Q2                            | 1.50 (0.37-6.05)  | 0.570               |                     | 1.31 (0.32-5.39)                   | 0.705                 |                     |
| Q3                            | 2.88 (0.74-11.30) | 0.128               |                     | 2.75 (0.70-10.86)                  | 0.149                 |                     |
| Q4                            | 3.22 (0.92-11.22) | 0.066               | 0.041 <sup>c)</sup> | 2.99 (0.86-10.48)                  | 0.086                 | 0.049 <sup>c)</sup> |
| OLGA stage                    |                   |                     |                     |                                    |                       |                     |
| 0                             | 1 (reference)     |                     |                     | 1 (reference)                      |                       |                     |
| 1                             | 1.95 (0.20-19.13) | 0.568               |                     | 1.81 (0.15-22.37)                  | 0.643                 |                     |
| 2                             | 0.65 (0.04-10.48) | 0.758               |                     | 0.62 (0.03-11.30)                  | 0.745                 |                     |
| 3                             | 0.67 (0.04-11.17) | 0.782               |                     | 0.58 (0.03-12.17)                  | 0.727                 |                     |
| 4                             | 1.29 (0.08-21.82) | 0.861               | 0.660               | 1.38 (0.08-24.72)                  | 0.829                 | 0.650               |
| OLGIM stage                   |                   |                     |                     |                                    |                       |                     |
| 0                             | 1 (reference)     |                     |                     | 1 (reference)                      |                       |                     |
| 1                             | 3.71 (0.43-31.87) | 0.232               |                     | 3.44 (0.39-30.09)                  | 0.265                 |                     |
| 2                             | 2.51 (0.30-20.93) | 0.396               |                     | 2.39 (0.28-20.33)                  | 0.424                 |                     |
| 3                             | 2.70 (0.30-24.65) | 0.379               |                     | 2.20 (0.23-20.90)                  | 0.492                 |                     |
| 4                             | 4.08 (0.45-37.05) | 0.212               | 0.393               | 3.61 (0.38-34.21)                  | 0.263                 | 0.537               |

CI, confidence interval; HR, hazard ratio; OLGA, operative link on gastritis assessment; OLGIM, operative link on gastric intestinal metaplasia assessment. <sup>a)</sup>Adjusted for age, sex, *Helicobacter pylori* infection status, and smoking, <sup>b)</sup>The cutoff value (35.82%) of high or low *MOS* methylation levels was determined by receiver operating curve analysis. Atrophic gastritis and intestinal metaplasia were defined as the presence of histologic atrophy (score 1-3) and intestinal metaplasia (score 1-3), respectively, at either antrum or corpus by the updated Sydney scoring system, <sup>c)</sup>Statistically significant.
