# Supplementary material for: Aberrant DNA Methylation Maker for Predicting Metachronous Recurrence After Endoscopic Resection of Gastric Neoplasms
Source: PubMed Central journal article supplement — Cancer Res Treat. 2022 Jan 18;54(4):1157–66. doi: 10.4143/crt.2021.997 (PMC9582476; doi:10.4143/crt.2021.997), 2022-01-18
Supplement: crt-2021-997_S4_Fig.pdf [file crt-2021-997_S4_Fig.pdf]

### (A) Atrophic gastritis

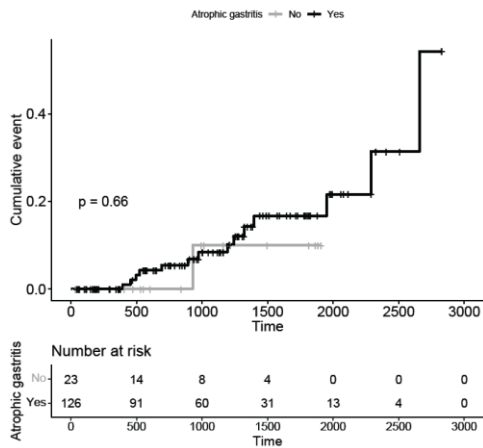

### (B) OLGA stage

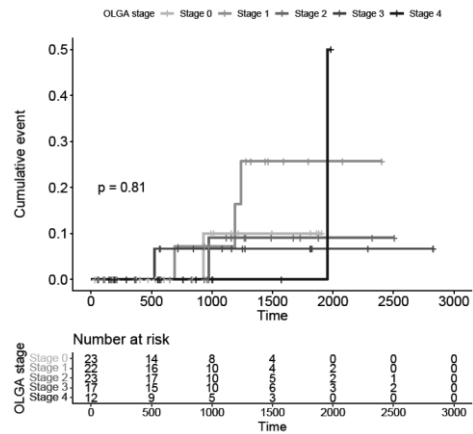

### (C) Intestinal metaplasia

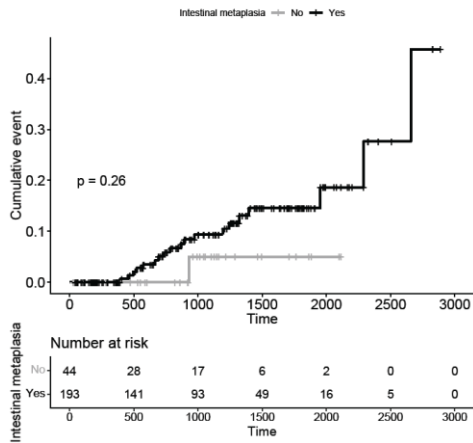

### (D) OLGIM stage

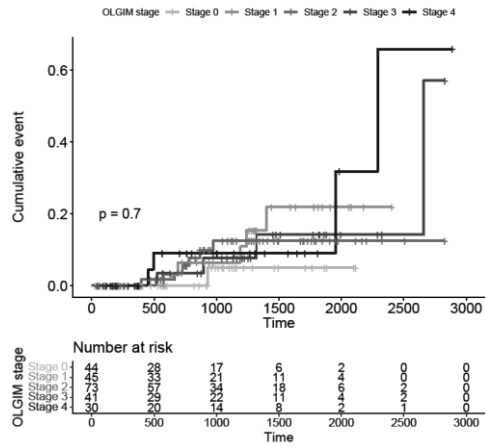

### (E) MOS methylation (cutoff value)

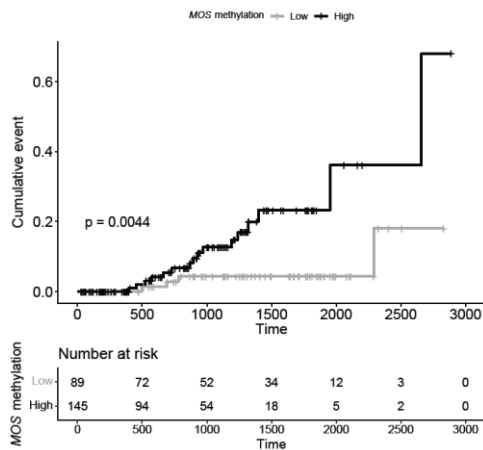

### (F) MOS methylation (quartiles)

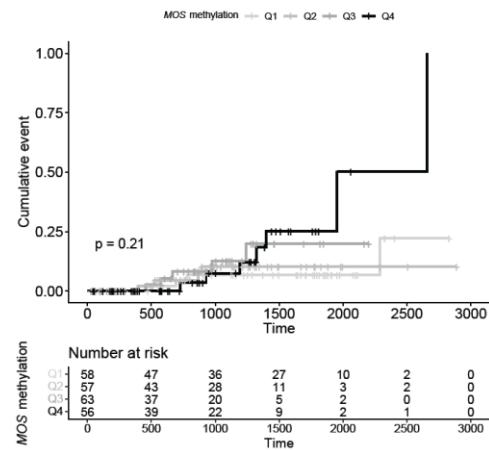

**S4 Fig.** Kaplan-Meier curves for cumulative incidences of metachronous recurrence according to atrophic gastritis (A), OLGA stage (B), intestinal metaplasia (C), OLGIM stage (D), *MOS* methylation status (E, F) in the whole cohort (n=261). Atrophic gastritis and intestinal metaplasia were defined as the presence of histologic atrophy (score 1-3) and intestinal metaplasia (score 1-3), respectively, at either antrum or corpus by the updated Sydney scoring system. The cutoff value (35.82%) of high or low level of *MOS* methylation was determined by receiver operating characteristic curve analysis. OLGA, operative link on gastritis assessment; OLGIM, operative link on gastric intestinal metaplasia assessment.
